# Supplementary material for: The State of Evidence in Patient Portals: Umbrella Review
Source: PubMed Central journal article supplement (PMC7688386; doi:10.2196/23851), 2020-11-11
Supplement: jmir_v22i11e23851_app1.pdf [file jmir_v22i11e23851_app1.pdf]

## Multimedia Appendix 1

Search Strategy: April 2018

### Ovid MEDLINE(R) Epub Ahead of Print, In-Process & Other Non-Indexed Citations, Ovid MEDLINE(R) Daily and Ovid MEDLINE(R) <1946 to Present>

---

- 1 patient portals/
- 2 ((patient\* or consumer\*) adj2 portal\*).ti,ab,kf.
- 3 (portal hypertension or portal vein\* or portal venous or ((proton or carbon) adj2 portal\*)).mp.
- 4 2 not 3
- 5 1 or 4
- 6 (exp "Health Records, Personal"/ or "Patient Access to Records"/) and (electronic or online or internet or web or portal\* or tethered).mp.
- 7 ((tethered adj3 record\*) or eclinician or mychart).ti,ab,kf.
- 8 1 or 5 or 6 or 7
- 9 meta-analysis.pt.
- 10 (meta-anal\$ or metaanal\$).mp.
- 11 ((quantitativ\$ adj3 review\$1) or (quantitativ\$ adj3 overview\$)).mp.
- 12 ((systematic\$ adj3 review\$) or (systematic adj3 overview\$)).mp.
- 13 ((methodologic adj3 review\$1) or (methodologic adj3 overview\$)).mp.
- 14 (integrat\$ adj5 research).mp.
- 15 (quantitativ\$ adj3 synthes\$).mp.
- 16 ((qualitative\* adj3 (review\* or overview)) or (meta-synthes\* or metasyntes\*)).mp.
- 17 or/9-16
- 18 review.pt. or (review\$ or overview\$).mp.
- 19 (medline or medlars or pubmed or index medicus or embase or cochrane).mp.
- 20 (scisearch or web of science or psycinfo or psychinfo or cinahl or cinhal).mp.
- 21 (excerpta medica or psychlit or psyclit or current contents or science citation index or sciences citation index or scopus).mp.
- 22 (hand search\$ or manual search\$).mp.
- 23 ((electronic adj3 database\$) or (bibliographic adj3 database\$) or periodical index\$).mp.
- 24 (pooling or pooled or mantel haenszel).mp.
- 25 (peto or der simonian or dersimonian or fixed effect\$).mp.
- 26 ((combine\$ or combining) adj5 (data or trial or trials or studies or study or result or results)).mp.
- 27 or/19-26
- 28 18 and 27
- 29 17 or 28
- 30 (hta\$ or health technology assessment\$ or biomedical technology assessment\$).mp.
- 31 technology assessment, biomedical/ or biomedical technology assessment/
- 32 30 or 31
- 33 29 or 32
- 34 8 and 33

## Embase <1974 to Current>

---

- 1 (patient\* adj2 portal\*).ti,ab,kw.
- 2 (portal hypertension or portal vein\* or portal venous or ((proton or carbon) adj2 portal\*)).mp.
- 3 1 not 2
- 4 ((tethered adj3 record\*) or eclinician or mychart).ti,ab,kw.
- 5 3 or 4
- 6 ((qualitative\* adj3 (review\* or overview)) or (meta-synthes\* or metasyntes\*)).mp.
- 7 (meta-anal\$ or metaanal\$).mp.
- 8 ((quantitativ\$ adj3 review\$1) or (quantitativ\$ adj3 overview\$)).mp.
- 9 ((systematic\$ adj3 review\$) or (systematic adj3 overview\$)).mp.
- 10 ((methodologic adj3 review\$1) or (methodologic adj3 overview\$)).mp.
- 11 (integrat\$ adj5 research).mp.
- 12 (quantitativ\$ adj3 syntes\$).mp.
- 13 or/6-12
- 14 review.pt. or (review\$ or overview\$).mp.
- 15 (medline or medlars or pubmed or index medicus or embase or cochrane).mp.
- 16 (scisearch or web of science or psycinfo or psychinfo or cinahl or cinhal).mp.
- 17 (excerpta medica or psychlit or psyclit or current contents or science citation index or sciences citation index or scopus).mp.
- 18 (hand search\$ or manual search\$).mp.
- 19 ((electronic adj3 database\$) or (bibliographic adj3 database\$) or periodical index\$).mp.
- 20 (pooling or pooled or mantel haenszel).mp.
- 21 (peto or der simonian or dersimonian or fixed effect\$).mp.
- 22 ((combine\$ or combining) adj5 (data or trial or trials or studies or study or result or results)).mp.
- 23 or/15-22
- 24 14 and 23
- 25 13 or 24
- 26 (hta\$ or health technology assessment\$ or biomedical technology assessment\$).mp.
- 27 technology assessment, biomedical/ or biomedical technology assessment/
- 28 26 or 27
- 29 25 or 28
- 30 5 and 29

## Cochrane Library (Cochrane Reviews and Other Reviews)

- #1 [mh "patient portals"] or ((patient\* or consumer\*) near/2 portal\*):ti,ab,kw
- #2 ("portal hypertension" or "portal vein\*" or "portal venous" or ((proton or carbon) near/2 portal\*)):ti,ab,kw
- #3 #1 not #2
- #4 [mh "Health Records, Personal"] or [mh "Patient Access to Records"] and (electronic or online or internet or web or portal\* or tethered):ti,ab,kw or (tethered near/3 record\*):ti,ab,kw or (eclinician or mychart):ti,ab,kw
- #5 #3 OR #4

## CINAHL

( patient\* n2 portal\* OR ( (MH "Patient Access to Records") and (electronic or online or web or portal\*) ) ) NOT ( "portal hypertension" or "portal vein\*" or "portal venous" or (proton or carbon) w2 portal\* ) OR tethered w3 record\* or eclinician or mychart

AND

TI review OR ( "meta analys\*" or "meta-synthes\*" or metanalysi\* or metasynthes\* ) OR ( (quantitative or qualitative or methodological or systematic) w3 (review or overview) ) OR

PT( "Meta Analysis" OR "Meta Synthesis" OR Review OR "Systematic Review")

## PROSPERO

patient portals

## Joanna Briggs via Journals@Ovid

Your Journals@Ovid

- 
- 1 "jbi\*" .jn.
  - 2 ((patient\* or consumer\*) adj2 portal\*).tw. Or ((tethered adj3 record\*) or eclinician or mychart).tw.
  - 3 1 and 2

## Scopus/Advanced Search

TITLE-ABS-KEY ( ( patient W/2 portal\* ) OR ( tethered w/3 record\* ) OR eclinician OR mychart ) AND TITLE-ABS-KEY ( ( systematic OR quantitative OR qualitative OR methodological ) PRE/3 ( review\* OR overview\* ) OR "meta-analys\*" OR metanalys\* OR "meta-synthes\*" OR metasynthes\* )

## Web of Science Core Collection/Advanced Search

TS=((patient near/2 portal\*) or( tethered near/3 record\*) or eclinician OR mychart ) AND TS=(( (systematic OR quantitative OR qualitative OR methodological) near/3 ( review\* OR overview\* ) ) OR "meta-analys\*" OR metanalys\* OR "meta-synthes\*" OR metasynthes\*) NOT TS=("portal hypertension" or "portal vein\*" or "portal venous" or ((proton or carbon) near/2 portal\* ))

## Proquest Dissertations & Theses Global

(patient near/2 portal\*) or (tethered near/3 record\*) or eclinician or mychart

AND

(systematic OR quantitative OR qualitative OR methodological) near/3 ( review\* OR overview\* ) OR "meta-analys\*" OR metanalys\* OR "meta-synthes\*" OR metasynthes\*
