# Supplementary material for: The State of Evidence in Patient Portals: Umbrella Review
Source: PubMed Central journal article supplement (PMC7688386; doi:10.2196/23851), 2020-11-11
Supplement: jmir_v22i11e23851_app4.pdf [file jmir_v22i11e23851_app4.pdf]

## Multimedia Appendix 4

**Table A: Support for Quantitative Umbrella Review Findings by Primary Study (PS) Findings from Systematic Reviews (SRs)**

| Umbrella review domain         | Umbrella review quantitative finding statements [SR source]                                                                                | Primary support used in GRADE-UR (Grading of Strength of Evidence for Quantitative Research at the Level of an Umbrella Review) process |                                                       |                                                                       | Secondary support: Number of PS findings (A=Agreement; D=Disagreement with the UR finding statement) |                                       |
|--------------------------------|--------------------------------------------------------------------------------------------------------------------------------------------|-----------------------------------------------------------------------------------------------------------------------------------------|-------------------------------------------------------|-----------------------------------------------------------------------|------------------------------------------------------------------------------------------------------|---------------------------------------|
|                                |                                                                                                                                            | Strength of umbrella review evidence <sup>a</sup>                                                                                       | PS design, number of PSs and sample size <sup>b</sup> | % of PS findings agreeing with umbrella review statement <sup>c</sup> | Mixed methods                                                                                        | Quantitative descriptive <sup>d</sup> |
| <b>Patient characteristics</b> |                                                                                                                                            |                                                                                                                                         |                                                       |                                                                       |                                                                                                      |                                       |
|                                | Patients with better controlled diabetes are more likely to enroll or use a portal as compared to other patients with diabetes [14,31,35]. | Moderate                                                                                                                                | RCT (1, 104)<br>non-RCT (8, 26217)                    | 100.0% agreement<br>0.0% neutral<br>0.0% disagreement                 | none                                                                                                 | 1xA<br>1xD                            |
|                                | Patients with private insurance in the US context are more likely to enroll or use a portal [14,15,31,34-36].                              | Moderate                                                                                                                                | non-RCT (8, 935967)                                   | 100.0% agreement<br>0.0% neutral<br>0.0% disagreement                 | 1xA                                                                                                  | 1xA                                   |
|                                | Patients with higher illness(es) burden or need are more likely to enroll or use portal [14,15,17,31,34,36].                               | Moderate                                                                                                                                | RCT (1, 4500)<br>non-RCT (7, 883797)                  | 91.0% agreement<br>9.0% neutral<br>0.0%                               | 1xA                                                                                                  | 5xA                                   |
|                                | White people are more likely to enroll or use a portal [14,15,31,32,34,36].                                                                | Moderate                                                                                                                                | RCT (2, 4598)<br>non-RCT (18, 464823)                 | 88.0% agreement<br>12.0% neutral<br>0.0% disagreement                 | 1xA                                                                                                  | 3xA<br>1xD                            |
|                                | Middle-aged people who are mid age ( $\leq 65$ years) are more likely to enroll or use a portal [14,17,31,32,34,36].                       | Moderate                                                                                                                                | RCT (1, 4500)<br>non-RCT (16, 570341)                 | 75.0% agreement<br>15.0% neutral<br>10.0% disagreement                | 1xA                                                                                                  | 9A                                    |
|                                | People who have a higher income are more likely to enroll or use a portal [14,15,24,31,35].                                                | Moderate                                                                                                                                | non-RCT (13, 207014)                                  | 71.4% agreement<br>28.6% neutral<br>0.0% disagreement                 | none                                                                                                 | 5xA                                   |
|                                | Males with diabetes are more likely to enroll or use portal as compared to females with diabetes [14,35].                                  | Moderate                                                                                                                                | non-RCT (7, 21778)                                    | 71.4% agreement<br>28.6% neutral<br>0.0%                              | none                                                                                                 | none                                  |

|                                     |                                                                                                                                                       |          |                                      |                                                         |                            |                                                        |
|-------------------------------------|-------------------------------------------------------------------------------------------------------------------------------------------------------|----------|--------------------------------------|---------------------------------------------------------|----------------------------|--------------------------------------------------------|
|                                     | Patients with higher health literacy are more likely to enroll or use portal [14,17,29,30].                                                           | Low      | non-RCT (10, 83119)                  | 85.7% agreement<br>14.3% neutral<br>0.0% disagreement   | 4xA<br>1XD (no difference) | 1xA                                                    |
|                                     | Females are more likely to access online information and use a portal [17,24,29,31,34-36].                                                            | Low      | RCT (1, 4500)<br>non-RCT (5, 929067) | 83.3% agreement<br>0.0% neutral<br>16.7% disagreement   | 3xA                        | 20xA<br>1xD (decreased)<br>2xD (mixed between genders) |
|                                     | People who have a higher education level are more likely to enroll in and use a patient portal [14,15,31,35,36].                                      | Low      | RCT (1, 4500)<br>non-RCT (9, 38924)  | 75.0% agreement<br>25.0% neutral<br>0.0% disagreement   | none                       | 2xA                                                    |
| <b>Patient-related facilitators</b> |                                                                                                                                                       |          |                                      |                                                         |                            |                                                        |
|                                     | Patient are more likely to register and use a portal after portal-related education and training [32].                                                | Moderate | RCT (5,521)<br>non-RCT (7, 71376)    | 58.30% agreement<br>41.7% neutral<br>0.00% disagreement | none                       | 4xA                                                    |
| <b>Patient satisfaction</b>         |                                                                                                                                                       |          |                                      |                                                         |                            |                                                        |
|                                     | Patients who use patient portals report higher satisfaction with communication, treatment, medications, and care [16,17,24,31,34,35].                 | Moderate | RCT (9, 3838)<br>non-RCT (1, 529605) | 64.3% agreement<br>35.7% neutral<br>0.0% disagreement   | 5xA                        | 21xA                                                   |
| <b>Behavioral effects</b>           |                                                                                                                                                       |          |                                      |                                                         |                            |                                                        |
|                                     | Use of patient portals can increase adherence, and mostly medication adherence, across different patient populations [16,17,24,31,33,34].             | Moderate | RCT (5, 1181)<br>non-RCT (4, 12990)  | 78.6% agreement<br>21.4% neutral<br>0.0% disagreement   | none                       | 9xA                                                    |
|                                     | Use of patient portals can improve screening, vaccinations, examinations and/or care across different patient populations [24,29,31,34,35].           | Moderate | RCT (3, 9039)<br>non-RCT (2, 14782)  | 77.0% agreement<br>23.0% neutral<br>0.0% disagreement   | 1xA                        | 3xA                                                    |
|                                     | Use of patient portals can improve visit preparation and communication and information sharing between patients and providers [14,16,17,24,31,34-36]. | Low      | RCT (4, 4764)<br>non-RCT (2, 541123) | 88.9% agreement<br>11.1% neutral<br>0.0% disagreement   | none                       | 13xA                                                   |

| Service utilization effects |                                                                                                                                                        |          |                                      |                                                                                   |      |                                            |
|-----------------------------|--------------------------------------------------------------------------------------------------------------------------------------------------------|----------|--------------------------------------|-----------------------------------------------------------------------------------|------|--------------------------------------------|
|                             | Health care provider's workload related to contacts and messaging does not change with patient portal adoption [24,29,31,34,35].                       | Moderate | RCT (3, 960)                         | 85.7% agreement<br>14.3% disagreement (increase)                                  | none | 10xA<br>20xD (increase)<br>12xD (decrease) |
|                             | Patients' access to social support and mental health and testing services does not change with portal use [31,33].                                     | Moderate | RCT (1, 129)<br>non-RCT (2, 7417)    | 100.0% agreement<br>0.0% disagreement                                             | none | none                                       |
|                             | Hospitalization rates do not change with patient portal use [16,31,34].                                                                                | Low      | RCT (2, 164)<br>non-RCT (1, 88642)   | 66.7% agreement<br>33.3% disagreement (reduced)                                   | none | none                                       |
|                             | Emergency department visits do not change with patient portal use [16,31,34,35].                                                                       | Low      | RCT (2, 859)<br>non-RCT (1, 88642)   | 66.7% agreement<br>33.3% disagreement (increased)                                 | none | 1xD (increased)                            |
|                             | Phone or messaging volume received by health care providers does not change with patient portal use [16,17,24,31,34].                                  | Low      | RCT (5, 1890)<br>non-RCT (3, 113530) | 44.4% agreement<br>44.4% disagreement (increase)<br>11.2% disagreement (decrease) | none | 8xA<br>2xD (increased)                     |
|                             | Patient portal use results in an increase in office, primary care, specialist, outpatient, or after-hour visits [15-17,24,31,34-36].                   | Low      | RCT (7, 5888)<br>non-RCT (6, 204719) | 47.4% agreement<br>36.8% neutral<br>10.5% disagreement                            | 1xA  | 4xA<br>1xD (decreased)                     |
|                             | Patient portal use does not reduce no-show rates [17,29,34].                                                                                           | Low      | RCT (2, 271)<br>non-RCT (1, 58942)   | 60.0% agreement<br>40.0% neutral<br>0.0% disagreement                             | none | 2xA                                        |
| Clinical outcomes           |                                                                                                                                                        |          |                                      |                                                                                   |      |                                            |
|                             | There is improvement in HbA1c <sup>e</sup> levels for patients with diabetes who use patient portals [15-17,31].                                       | Moderate | RCT (6, 2995)<br>non-RCT (8, 27662)  | 68.9% agreement<br>31.3% neutral<br>0.0%                                          | 1xA  | none                                       |
|                             | There is improvement in LDL <sup>f</sup> , HDL <sup>g</sup> , cholesterol, or lipids for patients with diabetes who use patient portals [15,16,31,35]. | Low      | RCT (4, 2407)<br>non-RCT (3, 1290)   | 50.0% agreement<br>50.0% neutral<br>0.0% disagreement                             | none | none                                       |
|                             | There is no change in systolic and diastolic blood pressure for patients with diabetes or hypertension who use                                         | Low      | RCT (7, 4139)<br>non-RCT (2, 4210)   | 63.6% agreement<br>36.4% disagreement (improved)                                  | none | none                                       |

|                                  |                                                                                                                                                                                                   |     |                                   |                                                    |      |      |
|----------------------------------|---------------------------------------------------------------------------------------------------------------------------------------------------------------------------------------------------|-----|-----------------------------------|----------------------------------------------------|------|------|
|                                  | patient portals [16,31,35].                                                                                                                                                                       |     |                                   |                                                    |      |      |
|                                  | Psychosocial, cognitive function, BMI <sup>h</sup> , symptom stability, and depression and anxiety status does not change across multiple patient populations who use patient portals [16,17,31]. | Low | RCT (5, 1276)<br>non-RCT (2, 369) | 66.70% agreement<br>33.30% disagreement (improved) | none | none |
| <b>Patient-oriented outcomes</b> |                                                                                                                                                                                                   |     |                                   |                                                    |      |      |
|                                  | Patient empowerment and self-efficacy scores do not change with portal use [16,31].                                                                                                               | Low | RCT (6, 1017)<br>non-RCT (1, 250) | 89.0% agreement<br>11.0% disagreement (improved)   | none | none |

<sup>a</sup> Indicates the strength in the evidence, and was calculated using GRADE-UR (Grading of Recommendations, Assessment, Development, and Evaluations at the Level of an Umbrella Review) based on study limitations, directness, consistency, precision and reporting of bias. Ratings are from **high**, **moderate** and **low**.

<sup>b</sup> Design of the primary studies: whether they are a RCT or non-RCT. Number in brackets indicate the number of primary studies that have this design followed by the total number of participants across primary studies.

<sup>c</sup> Vote Counting: top number is % of findings that agree with statement, middle number indicates neutral finding to statement and bottom number indicates % of findings disagreeing with the statement. A neutral finding indicates one where the PS finding was reported as no change or no statistical significance was found.

<sup>d</sup> Quantitative descriptive findings originate from primary quantitative studies for which SR authors a) did not report statistical significance, or b) reported statistical significance, but did not have sufficient number of finding (i.e. greater than 2) to be included in GRADE-UR evaluation.

<sup>e</sup>HbA<sub>1c</sub>: hemoglobin A<sub>1c</sub>.

<sup>f</sup>LDL: low-density lipoprotein.

<sup>g</sup>HDL, high-density lipoprotein.

<sup>h</sup> BMI: body mass index

**Table B: Support for qualitative umbrella review findings by primary study (PS) findings from systematic reviews (SRs)**

| Umbrella review domain                                | Umbrella review qualitative finding statements [SR source]                                                                                                                                                 | Confidence in the umbrella review evidence (based on CERQual-UR criteria) <sup>a</sup> | Number of PS findings<br>(A=Agreement; D=Disagreement with the UR finding statement) |               |                                       |
|-------------------------------------------------------|------------------------------------------------------------------------------------------------------------------------------------------------------------------------------------------------------------|----------------------------------------------------------------------------------------|--------------------------------------------------------------------------------------|---------------|---------------------------------------|
|                                                       |                                                                                                                                                                                                            |                                                                                        | Qualitative                                                                          | Mixed methods | Quantitative descriptive <sup>b</sup> |
| <b>Patients' interest in the potential of portals</b> |                                                                                                                                                                                                            |                                                                                        |                                                                                      |               |                                       |
|                                                       | Patients are interested and satisfied in using patient portals if they are easy to use and useful [15,17,24,31,33,35].                                                                                     | High                                                                                   | 13xA                                                                                 | 1XA           | 7xA                                   |
|                                                       | Patients are interested in patient portals for communication and opportunity to message providers [17,24,30,33].                                                                                           | High                                                                                   | 11xA                                                                                 | 1xA           | 3xA                                   |
| <b>Portal design</b>                                  |                                                                                                                                                                                                            |                                                                                        |                                                                                      |               |                                       |
|                                                       | Patients value information in patient portals that is easy to understand, written in lay or non-medical language, transparent and presented in a simply display [29,33].                                   | High                                                                                   | 10xA                                                                                 | 4xA           | 1xA                                   |
|                                                       | Patients want prescription refills, and hospitalized patients in particular want information on medication that includes dose, frequency, timing, administration, route and side effects [15,17,29,31,33]. | High                                                                                   | 8xA                                                                                  | 3xA           | 2xA                                   |
|                                                       | Minimal navigation steps and educational information on specific laboratory results, medications and allergies are important health equity and patient-friendly considerations [15,29,33].                 | Moderate                                                                               | 7xA                                                                                  | 43xA          | 1XA                                   |
|                                                       | The information within patient portals gives patients and parents a greater sense of control, involvement, understanding and security in care planning [15,17,24,33,35].                                   | Moderate                                                                               | 7xA                                                                                  | 5xA           | 6xA                                   |
|                                                       | Patients appreciate the scheduling function in patient portals, such as booking appointments online and scheduling, and daily planning in inpatient setting [15,29,33].                                    | Low                                                                                    | 4xA                                                                                  | none          | none                                  |

| <b>System-related factors</b>            |                                                                                                                                                                                                                                            |          |           |             |            |
|------------------------------------------|--------------------------------------------------------------------------------------------------------------------------------------------------------------------------------------------------------------------------------------------|----------|-----------|-------------|------------|
|                                          | Guideline development, framework for governance, and compliance with regulations are important for integrating patient portals into organizational processes [24,33].                                                                      | Moderate | 6xA       | 1xA         | 8xA        |
| <b>Patient-related facilitators</b>      |                                                                                                                                                                                                                                            |          |           |             |            |
|                                          | Use of patient portals is facilitated by the enhanced communication over traditional methods and positive patient-provider interactions and relationships [14,33,36].                                                                      | Low      | 8xA       | none        | none       |
|                                          | Encouragement and instruction on patient portals offered by providers and families is a facilitator of portal use [14,29,36].                                                                                                              | Low      | 5xA       | none        | 8xA<br>1xD |
| <b>Patient-related barriers</b>          |                                                                                                                                                                                                                                            |          |           |             |            |
|                                          | Patient barriers to portal use and enrollment include time, limited system knowledge, lack of awareness of patient portals and related features, and doubt or lack of belief in portal benefits or value [14,17,29,35,36].                 | Moderate | 14xA      | 1xA         | 4xA        |
|                                          | Technical barriers to portal use and enrollment include type of interface, lack of technical or computer skills or training, support, or literacy, lack of computer/internet access, and forgotten passwords [14,15,17,24,29-31,33,35,36]. | Moderate | 12xA; 1xD | 3xA         | 19xA       |
|                                          | Unauthorized access, privacy, security and trust/confidentiality concerns are barriers to portal use and enrollment [14,15,17,24,29-31,33,36].                                                                                             | Moderate | 12xA      | 2xA,<br>1xD | 5xA<br>1xD |
|                                          | Patients' lack of desire in enrolling and using portals relates to their preferences and satisfaction with existing means of communication [14,17].                                                                                        | Very low | 5xA       | none        | none       |
| <b>Providers' attitudes and concerns</b> |                                                                                                                                                                                                                                            |          |           |             |            |
|                                          | Providers are concerned about liability and increases or changes in workload, and the lack of training, skills and resources for using patient portals, and prefer to have                                                                 | Moderate | 12xA      | 2xA         | 11xA       |

|                                   |                                                                                                                                                                                                                                                                                                                                              |          |             |         |       |
|-----------------------------------|----------------------------------------------------------------------------------------------------------------------------------------------------------------------------------------------------------------------------------------------------------------------------------------------------------------------------------------------|----------|-------------|---------|-------|
|                                   | support staff screen messages [24,29,33].                                                                                                                                                                                                                                                                                                    |          |             |         |       |
|                                   | Providers are concerned that the information contained in portals may overwhelm, cognitively overload, or increase anxiety for patients, and that patient-generated data may be inaccurate [24,29,33,34].                                                                                                                                    | Moderate | 6xA         | 1xA 3xD | 6XA   |
|                                   | Providers perceive patient portals could encourage patient engagement, and secure messaging could support communication of complex information, while having concerns about impact on patient-provider relationships [24,29,33].                                                                                                             | Low      | 4xA, 2xD    | none    | none  |
|                                   | Providers are concerned about patient safety, privacy and confidentiality, and prefer control over access and authentication of users to protect the information in patient portals [24,33].                                                                                                                                                 | Low      | 5xA         | none    | 109xA |
|                                   | Lack of incentive and reimbursement may result in providers being less engaged with portals than patients may assume, and instructing patients not to use [14,31].                                                                                                                                                                           | Low      | 4xA         | none    | none  |
| <b>Usability-related barriers</b> |                                                                                                                                                                                                                                                                                                                                              |          |             |         |       |
|                                   | Usability-related barriers which result in negative experiences and use of patient portals include: reminders and messages that are unreliable, have a slow response, or may not directly reach providers, and information that is inaccurate or difficult to locate due to complex navigation, visual layout and language [14,15,29-31,35]. | Low      | 13xA<br>1xD | 7xA     | 3xA   |
| <b>Patient satisfaction</b>       |                                                                                                                                                                                                                                                                                                                                              |          |             |         |       |
|                                   | Online communication with providers outside their hours is preferred by patients and parents, as it is easier to understand, more convenient, supports accessing test results, and allows for timely and consistent responses [15,24,29,33,35].                                                                                              | Moderate | 11xA        | none    | 11xA  |

| Patient safety              |                                                                                                                                                                                                                             |          |            |                       |                       |
|-----------------------------|-----------------------------------------------------------------------------------------------------------------------------------------------------------------------------------------------------------------------------|----------|------------|-----------------------|-----------------------|
|                             | Patient portals enhance patient safety when patients find and request correction of errors, especially medication errors [17,24,33,35,36].                                                                                  | Moderate | 6xA        | none                  | 8xA                   |
|                             | Patients with limited health and computer literacy value portal use, but safe and effective use may be compromised by an inability to interpret results and having to take longer to complete patient portal tasks [29,30]. | Low      | 7xA        | 1xA                   | none                  |
| Behavioral effects          |                                                                                                                                                                                                                             |          |            |                       |                       |
|                             | Patient portals can facilitate access to medical information that can engage and empower patients to be confident in their self-management and current care [17,29,31,34-36].                                               | Low      | 10xA       | 1xA                   | 5xA                   |
| Service utilization effects |                                                                                                                                                                                                                             |          |            |                       |                       |
|                             | Patient portals can impact provider workload, by increasing number of phone calls or emails/secure messaging and length of face-to-face visits [17,24,29,31,34,35].                                                         | Very low | 5xA<br>4xD | none<br>(see Table A) | none<br>(see Table A) |
| Patient-oriented outcomes   |                                                                                                                                                                                                                             |          |            |                       |                       |
|                             | Patient portals can empower patients in shared decision making, preparing for visits, better expression of ideas and concerns, and encouraging engagement in self-care and self-management [17,24,31,35].                   | Moderate | 10xA       | none                  | 6xA                   |
|                             | Patient portals support communication, enhance discussions and shifts power relations between patients and providers [17,24,29,33,35].                                                                                      | Moderate | 9xA        | none                  | none                  |
|                             | Patient portals can improve quality of care and caregiver experience, and reduce care burden [17,31,33]                                                                                                                     | Low      | 4xA        | none                  | 1xA<br>1xD            |

<sup>a</sup> Indicates the confidence in the evidence, and was calculated using CERQual-UR (Grading of Confidence in the Evidence of Qualitative Research at the Level of an Umbrella Review) based on methodological limitations, coherence, relevance and adequacy. Ratings are from **high**, **moderate**, **low**, and **very low**.

<sup>b</sup> Quantitative descriptive findings originate from quantitative PSs for which SR authors: a) did not report statistical significance, or b) reported statistical significance, but did not have sufficient number of finding (i.e. greater than 2) to be included in GRADE-UR evaluation.
